# Supplementary material for: The mountains of giants: an anthropometric survey of male youths in Bosnia and Herzegovina
Source: PubMed Central journal article supplement (PMC5414258; doi:10.1098/rsos.161054), 2017-04-12
Supplement: rsos161054supp1.pdf [file rsos161054supp1.pdf]

## **Supplementary material**

**Table S1a.** Averages of boys in the measured schools (Federation).

| Region<br>TOWN, school                      | n          | Height (cm)       |             | Age (years)      |           |
|---------------------------------------------|------------|-------------------|-------------|------------------|-----------|
|                                             |            | Average (SD)      | Range       | Average (SD)     | Range     |
| <b>Canton Una-Sana</b>                      | <b>193</b> | <b>180.0 ±6.8</b> |             | <b>18.4 ±0.4</b> |           |
| BIHAĆ, Gimnazija                            | 67         | 181.9 ±6.6        | 167.7-199.0 | 18.3 ±0.5        | 17.5-19.2 |
| BIHAĆ, Unsko-sanski koledž                  | 10         | 179.8 ±5.8        | 170.9-190.6 | 18.4 ±0.4        | 17.9-19.1 |
| BIHAĆ, Medicinska                           | 24         | 179.5 ±6.6        | 161.0-191.3 | 18.5 ±0.3        | 17.7-19.3 |
| BIHAĆ, Mješovita srednja                    | 87         | 178.9 ±6.8        | 162.5-196.3 | 18.4 ±0.3        | 17.4-19.5 |
| BIHAĆ, Katolički školski centar             | 5          | 177.6             | 171.7-185.9 | 18.2             | 17.8-18.8 |
| <b>Canton 10/Livno</b>                      | <b>222</b> | <b>183.7 ±6.7</b> |             | <b>18.3 ±0.6</b> |           |
| LIVNO, Ekonomska                            | 28         | 185.5 ±6.0        | 174.9-198.0 | 18.8 ±0.3        | 18.1-19.7 |
| LIVNO, Gimnazija                            | 44         | 184.7 ±6.4        | 171.9-198.4 | 18.3 ±0.4        | 17.4-19.1 |
| TOMISLAVGRAD, Gimnazija M. Marulića         | 29         | 184.3 ±7.3        | 166.7-196.0 | 18.0 ±0.5        | 17.0-18.7 |
| DRVAR, Srednja škola                        | 11         | 184.1 ±6.5        | 173.4-197.2 | 18.3 ±0.6        | 17.7-20.1 |
| TOMISLAVGRAD, Strukovna                     | 22         | 183.6 ±6.6        | 162.9-194.6 | 17.9 ±0.6        | 17.0-18.6 |
| LIVNO, Strukovna S. Š. Kranjčevića          | 71         | 183.3 ±6.5        | 170.2-200.8 | 18.6 ±0.4        | 17.7-20.3 |
| GLAMOČ, Srednja škola Tin Ujević            | 17         | 178.8 ±6.3        | 167.0-191.4 | 17.6 ±0.5        | 17.0-18.4 |
| <b>Canton Western Herzegovina</b>           | <b>215</b> | <b>184.0 ±6.6</b> |             | <b>18.2 ±0.5</b> |           |
| ŠIROKI BRIJEG, Gimnazija                    | 28         | 186.5 ±5.5        | 177.8-202.0 | 18.4 ±0.3        | 17.2-18.9 |
| LJUBUŠKI, Gimnazija                         | 37         | 185.2 ±6.9        | 172.2-204.0 | 18.4 ± 0.5       | 17.3-19.1 |
| ŠIROKI BRIJEG, Strukovna                    | 47         | 184.4 ±6.6        | 170.5-201.8 | 18.3 ±0.4        | 17.6-19.0 |
| POSUŠJE, Strukovna                          | 29         | 183.9 ±5.9        | 175.3-201.5 | 18.1 ±0.3        | 17.4-18.5 |
| GRUDE, Srednja škola A. B. Šimića           | 21         | 183.1 ±7.1        | 173.1-197.4 | 17.8 ±0.3        | 17.1-18.4 |
| POSUŠJE, Gimnazija                          | 27         | 182.2 ±4.3        | 173.8-194.0 | 18.1 ±0.4        | 17.4-19.2 |
| LJUBUŠKI, SSŠ Rudera Boskovića              | 26         | 181.5 ±8.3        | 162.4-194.7 | 18.3 ± 0.6       | 17.4-19.3 |
| <b>Canton Herzegovina-Neretva</b>           | <b>354</b> | <b>182.7 ±6.5</b> |             | <b>18.1 ±0.4</b> |           |
| MOSTAR, Gradevinska (Croatian)              | 17         | 187.5 ±4.7        | 178.9-200.4 | 18.0 ±0.3        | 17.6-18.6 |
| ČAPLJINA, Srednja škola                     | 22         | 184.8 ±5.5        | 175.8-199.5 | 18.2 ±0.3        | 17.6-18.8 |
| JABLANICA, Srednja škola                    | 26         | 184.7 ±5.9        | 171.5-198.7 | 18.2 ±0.4        | 17.1-19.3 |
| STOLAC, Srednja škola                       | 38         | 183.5 ±6.4        | 178.3-195.6 | 18.2 ±0.4        | 17.6-18.5 |
| MOSTAR, Turističko-ugostiteljska (Croatian) | 11         | 182.6 ±7.6        | 164.9-196.2 | 18.1 ±0.4        | 17.5-18.7 |
| MOSTAR, Elektrotehnička (Bosniak)           | 57         | 182.5 ±7.4        | 167.6-200.6 | 18.1 ±0.3        | 17.3-18.7 |
| MOSTAR, Druga gimnazija (Bosniak)           | 20         | 181.9 ±4.7        | 173.0-192.5 | 18.1 ±0.3        | 17.6-18.5 |
| MOSTAR, Ekonomska (Croatian)                | 24         | 181.8±6.0         | 170.7-193.9 | 18.4 ±0.5        | 17.3-19.0 |
| KONJIČ, Srednja škola                       | 49         | 181.7 ±6.9        | 160.9-195.0 | 18.2 ±0.5        | 17.1-19.8 |
| MOSTAR, Prometna (Croatian)                 | 35         | 181.5 ±6.3        | 169.1-194.9 | 18.2 ±0.4        | 17.5-19.7 |
| MOSTAR, Strojarska (Croatian)               | 30         | 181.3 ±4.8        | 168.2-187.4 | 18.1 ±0.4        | 17.6-19.6 |
| MOSTAR, Medicinska (Bosniak)                | 25         | 180.9 ±7.3        | 162.5-197.0 | 17.9 ±0.4        | 17.2-18.7 |
| <b>Canton Central Bosnia</b>                | <b>145</b> | <b>181.8 ±6.5</b> |             | <b>18.6 ±0.4</b> |           |
| BUGOJNO, Tehnička                           | 20         | 183.7 ±5.9        | 172.2-194.3 | 18.7 ±0.4        | 18.0-19.8 |
| DONJI VAKUF, Mješovita srednja              | 20         | 182.0 ±6.1        | 171.4-192.7 | 18.2 ±0.5        | 17.3-19.4 |
| NOVI TRAVNIK, Opća gimnazija                | 54         | 182.0 ±7.5        | 168.0-203.3 | 18.6 ±0.4        | 17.7-19.8 |
| BUGOJNO, Gimnazija                          | 30         | 181.2 ±5.9        | 170.9-192.5 | 18.5 ±0.3        | 17.8-19.1 |
| TRAVNIK, Mješovita srednja                  | 21         | 180.1 ±5.5        | 167.0-189.5 | 18.7 ±0.3        | 18.1-19.2 |

| Region<br>TOWN, school                   | n          | Height (cm)       |             | Age (years)      |           |
|------------------------------------------|------------|-------------------|-------------|------------------|-----------|
|                                          |            | Average (SD)      | Range       | Average (SD)     | Range     |
| <b>Canton Zenica-Doboj</b>               | <b>230</b> | <b>181.3 ±5.9</b> |             | <b>18.2 ±0.4</b> |           |
| ZENICA, Opća gimnazija                   | 33         | 183.5 ±5.6        | 174.5-196.4 | 18.0 ±0.5        | 17.0-18.7 |
| ZENICA, Ekonomska                        | 16         | 182.2 ±6.2        | 171.3-195.3 | 18.2 ±0.4        | 17.9-19.3 |
| ZENICA, Muzička                          | 7          | 181.1 ±5.9        | 172.0-188.2 | 18.1 ±0.4        | 17.3-18.7 |
| ZENICA, Prva gimnazija                   | 45         | 181.0 ±5.7        | 168.3-193.4 | 18.2 ±0.3        | 17.4-19.1 |
| ZENICA, Tehnička                         | 116        | 180.8 ±5.6        | 167.6-196.6 | 18.3 ±0.3        | 17.6-19.1 |
| ZENICA, Druga gimnazija                  | 13         | 180.7 ±7.3        | 169.2-200.3 | 18.0 ±0.4        | 17.5-19.1 |
| <b>Canton Sarajevo</b>                   | <b>360</b> | <b>181.8 ±6.8</b> |             | <b>18.4 ±0.6</b> |           |
| SARAJEVO, Druga gimnazija                | 24         | 184.0 ±5.4        | 172.6-194.0 | 18.1 ±0.3        | 17.4-18.7 |
| SARAJEVO, Treća gimnazija                | 28         | 182.9±5.8         | 169.4-193.0 | 17.5±0.2         | 17.0-17.9 |
| SARAJEVO, Građevinsko-geodetska          | 30         | 182.5 ±5.0        | 169.8-196.7 | 18.7 ±0.6        | 17.6-20.0 |
| SARAJEVO, Elektrotehnička za energetiku  | 66         | 182.3 ±6.9        | 159.7-198.1 | 18.6 ±0.4        | 17.7-19.7 |
| SARAJEVO, Dizajnerska                    | 15         | 182.3 ±5.0        | 173.9-192.2 | 18.7 ±0.5        | 18.0-20.2 |
| SARAJEVO, Prominjenjih umjetnosti        | 14         | 182.1±6.6         | 175.2-202.0 | 18.7±0.4         | 18.3-19.6 |
| SARAJEVO, Gimnazija Obala                | 8          | 181.8 ±5.1        | 172.9-187.1 | 18.4 ±0.7        | 17.6-19.8 |
| SARAJEVO, Prva gimnazija                 | 22         | 181.8±7.1         | 168.6-196.0 | 18.4±0.4         | 17.8-19.4 |
| SARAJEVO, Ugostiteljsko-turistička       | 50         | 181.6±7.9         | 165.3-205.3 | 18.6±0.6         | 17.6-20.1 |
| SARAJEVO, Katolički školski centar       | 25         | 180.7 ±7.5        | 167.5-199.3 | 18.3 ±0.4        | 17.6-19.7 |
| SARAJEVO, Ekonomska                      | 26         | 180.6 ±6.1        | 165.6-193.6 | 18.4±0.4         | 17.4-19.0 |
| SARAJEVO, Metalskih zanimanja            | 52         | 180.3 ±7.0        | 159.9-194.4 | 18.3 ±0.6        | 17.3-19.9 |
| <b>Canton Tuzla</b>                      | <b>233</b> | <b>179.9 ±5.9</b> |             | <b>18.1 ±0.4</b> |           |
| TUZLA, Turističko-ugostiteljska          | 3          | 181.8             | 173.2-186.9 | 17.9             | 17.6-18.2 |
| TUZLA, Ekonomska                         | 9          | 181.7 ±1.9        | 179.0-185.0 | 17.9 ±0.5        | 17.0-18.6 |
| GRAČANICA, Gimnazija                     | 21         | 181.6 ±5.0        | 170.5-190.8 | 18.1 ±0.3        | 17.3-18.5 |
| TUZLA, Medicinska                        | 43         | 181.0 ±5.4        | 170.7-194.9 | 18.1 ±0.4        | 17.4-19.5 |
| TUZLA, Rudarska                          | 41         | 180.8 ±6.1        | 165.5-193.0 | 18.2 ±0.6        | 17.1-20.6 |
| TUZLA, Građevinsko-geodetska             | 36         | 179.6 ±6.0        | 168.6-194.0 | 18.1 ±0.4        | 17.2-18.7 |
| TUZLA, Gimnazija Ismet Mujezinović       | 17         | 179.6 ±4.7        | 170.1-184.1 | 18.4 ±0.3        | 18.0-19.0 |
| DOBOJ-ISTOK, Mješovita srednja           | 20         | 178.4 ±6.9        | 167.1-193.7 | 17.6 ±0.4        | 17.1-18.3 |
| GRAČANICA, Mješovita srednja             | 43         | 177.8 ±6.1        | 165.3-191.1 | 18.3 ±0.2        | 18.0-18.7 |
| <b>Canton Gorazde (Bosnian-Podrinje)</b> | <b>69</b>  | <b>180.5 ±6.2</b> |             | <b>18.1 ±0.4</b> |           |
| GORAŽDE, Tehnička Hasib Hadžović         | 49         | 181.5 ±5.6        | 168.3-192.0 | 18.0 ±0.4        | 17.7-19.4 |
| GORAŽDE, Mješovita srednja E. Pozderović | 20         | 177.9 ±6.8        | 164.8-188.0 | 18.2 ±0.3        | 17.7-18.7 |

Abbreviations: SŠŠ = Srednja strukovna škola (high vocational school).

**Table S1b.** Averages of boys in the measured schools (Republika Srpska).

| Region<br>TOWN, school                    | n          | Height (cm)       |             | Age (years)      |           |
|-------------------------------------------|------------|-------------------|-------------|------------------|-----------|
|                                           |            | Average (SD)      | Range       | Average (SD)     | Range     |
| <b>Region Prijedor</b>                    | <b>192</b> | <b>180.9 ±7.2</b> |             | <b>18.6 ±0.5</b> |           |
| PRIJEDOR, Gimnazija Sveti Sava            | 31         | 183.2 ±7.4        | 171.2-199.4 | 18.6 ±0.4        | 17.5-19.3 |
| PRIJEDOR, Elektrotehnička                 | 58         | 181.7 ±7.6        | 164.9-200.3 | 18.5 ±0.5        | 17.6-19.5 |
| PRIJEDOR, Medicinsko-tehnološka i gradev. | 33         | 180.2 ±5.8        | 169.0-194.7 | 18.6 ±0.4        | 18.0-19.8 |
| PRIJEDOR, Mašinska                        | 70         | 179.5 ±7.0        | 166.8-201.0 | 18.5 ±0.5        | 17.6-19.6 |
| <b>Region Banja Luka</b>                  | <b>170</b> | <b>180.6 ±6.6</b> |             | <b>18.4 ±0.5</b> |           |
| BANJA LUKA, Gimnazija                     | 47         | 181.7 ±6.8        | 170.9-200.4 | 18.7 ±0.4        | 18.1-20.2 |
| BANJA LUKA, Ugost.-trgov.-turistička      | 56         | 180.3 ±7.0        | 165.3-198.0 | 18.2 ±0.5        | 17.3-19.2 |
| BANJA LUKA, Poljoprivredna                | 28         | 180.1 ±5.9        | 170.8-194.3 | 17.9 ±0.3        | 17.4-18.3 |
| BANJA LUKA, Elektrotehnička „N. Tesla“    | 19         | 180.0 ±6.4        | 167.0-193.5 | 17.8 ±0.4        | 18.2-19.4 |
| BANJA LUKA, Tehnološka                    | 20         | 179.8 ±5.8        | 167.3-194.0 | 18.9 ±0.6        | 18.1-20.3 |
| <b>Region Mrkonjić Grad</b>               | <b>80</b>  | <b>180.3 ±6.2</b> |             | <b>18.3 ±0.6</b> |           |
| MRKONJIĆ GRAD, Gimnazija                  | 39         | 180.6 ±7.4        | 167.2-197.2 | 18.1 ±0.6        | 17.0-19.6 |
| MRKONJIĆ GRAD, Mašinska                   | 41         | 180.0 ±4.7        | 170.9-189.0 | 18.5 ±0.5        | 17.6-19.6 |
| <b>Region Doboј</b>                       | <b>167</b> | <b>179.8 ±6.5</b> |             | <b>18.1 ±0.4</b> |           |
| DOBOJ, Medicinska                         | 28         | 180.4 ±6.7        | 166.0-199.6 | 18.1 ±0.5        | 17.1-19.5 |
| DOBOJ, Saobracajna i elektro-škola        | 55         | 180.3 ±6.3        | 166.3-197.3 | 18.2 ±0.3        | 17.2-18.8 |
| DOBOJ, Upravna & ugostiteljska            | 32         | 179.5 ±6.8        | 165.1-191.4 | 18.1 ±0.4        | 17.0-18.8 |
| DOBOJ, Ekonomska & trgovinska             | 16         | 179.5 ±4.7        | 170.6-186.9 | 17.9 ±0.5        | 17.1-18.7 |
| DOBOJ, Tehnička                           | 36         | 178.8 ±6.8        | 164.5-195.3 | 18.1 ±0.5        | 17.0-19.5 |
| <b>Region Bijeljina-Zvornik</b>           | <b>233</b> | <b>181.2 ±6.8</b> |             | <b>18.0 ±0.5</b> |           |
| BIJELJINA, Gimnazija Filip Višnjić        | 32         | 183.1 ±5.5        | 170.9-194.4 | 17.4 ±0.3        | 17.0-18.5 |
| BIJELJINA, Tehnička Mihaljo Pupin         | 67         | 181.6 ±7.8        | 164.2-200.0 | 18.2 ±0.3        | 17.7-18.8 |
| ZVORNIK, Gimnazija & stručna              | 12         | 181.1 ±5.7        | 168.6-190.3 | 17.3 ±0.2        | 17.0-17.6 |
| BIJELJINA, Ekonomska                      | 34         | 180.8 ±5.8        | 163.9-193.0 | 18.3 ±0.3        | 17.6-19.3 |
| ZVORNIK, Ekonomska                        | 12         | 180.8 ±6.4        | 164.3-189.6 | 17.8 ±0.5        | 17.1-18.5 |
| UGLJEVIK, Sr. škola 'M. Petrović Alas'    | 29         | 180.2 ±5.6        | 166.2-192.8 | 18.3 ±0.3        | 17.7-18.9 |
| ZVORNIK, Tehnički školski centar          | 47         | 180.1 ±7.1        | 165.6-197.8 | 18.1 ±0.4        | 17.3-18.8 |
| <b>Region Istočno Sarajevo</b>            | <b>60</b>  | <b>184.0 ±5.5</b> |             | <b>18.1 ±0.4</b> |           |
| ISTOČNO SARAJEVO, Gimnazija & stručna     | 21         | 185.9 ±4.9        | 176.8-198.0 | 18.1 ±0.3        | 17.5-18.6 |
| ISTOČNO SARAJEVO, Sr. škola 28. juni      | 39         | 182.7 ±5.5        | 171.4-193.0 | 18.1 ±0.4        | 17.3-19.6 |
| <b>Region Romanija-Foča</b>               | <b>91</b>  | <b>181.1 ±6.4</b> |             | <b>18.3 ±0.3</b> |           |
| FOČA, SŠC                                 | 11         | 183.1 ±8.4        | 172.6-196.3 | 18.2 ±0.2        | 17.9-18.6 |
| PALE, SSČ                                 | 23         | 181.4 ±6.5        | 169.6-195.4 | 18.4 ±0.4        | 17.9-19.5 |
| ROGATICA, Srednja škola                   | 57         | 180.5 ±5.9        | 166.8-189.9 | 18.3 ±0.3        | 17.8-19.5 |
| <b>Region Trebinje</b>                    | <b>193</b> | <b>184.6 ±7.6</b> |             | <b>18.5 ±0.5</b> |           |
| TREBINJE, Tehnička                        | 21         | 187.0 ±7.3        | 174.7-200.0 | 18.7 ±0.4        | 18.0-19.2 |
| TREBINJE, Gimnazija Jovan Dučić           | 61         | 185.7 ±7.3        | 175.4-206.6 | 18.3 ±0.5        | 17.4-19.3 |
| NEVESINJE, SŠC Aleksa Šantić              | 71         | 184.5 ±7.1        | 164.4-201.6 | 18.6 ±0.4        | 18.1-20.4 |
| TREBINJE, Centar srednjih škola           | 40         | 182.0 ±8.4        | 163.1-204.0 | 18.2 ±0.5        | 17.5-19.2 |

Abbreviations: SŠC = Srednjoškolski centar (high school center).

**Table S2.** Averages of girls in the measured schools.

| TOWN, school                 | <i>n</i> | Average age (SD) | Height (cm)  |             | Average height of boys from the same school | Difference in height between sexes |
|------------------------------|----------|------------------|--------------|-------------|---------------------------------------------|------------------------------------|
|                              |          |                  | Average (SD) | Range       |                                             |                                    |
| TOMISLAVGRAD, Gimnazija      | 11       | 17.9 ±0.2        | 171.0 ±5.6   | 158.8-180.5 | 184.3                                       | 13.3                               |
| POSUŠJE, Strukovna           | 19       | -                | 169.4 ±4.5   | 161.8-180.7 | 183.9                                       | 14.5                               |
| GLAMOČ, Sr. škola Tin Ujević | 10       | 17.7 ±0.3        | 169.3 ±5.3   | 161.9-178.7 | 178.8                                       | 9.5                                |
| DRVAR, Srednja škola         | 11       | 18.2 ±0.4        | 169.2 ±6.1   | 154.1-175.4 | 184.1                                       | 14.9                               |
| MOSTAR, Druga gimnazija      | 18       | 18.0 ±0.3        | 168.3 ±7.6   | 158.6-189.8 | 181.9                                       | 13.6                               |
| <b>TOTAL</b>                 | 69       | 18.0 ±0.4        | 169.4 ±6.0   | 154.1-189.8 |                                             |                                    |

**Table S3a.** Regional averages of male height (based on the self-reported place of residence) and population size in each region, relative to the total population of BiH (excluding Canton Posavina and the Brčko district).

| Region                     | Average height (cm) | Population       | % total      |
|----------------------------|---------------------|------------------|--------------|
| Region Trebinje            | 184.5               | 72,767           | 2.0          |
| Canton Western Herzegovina | 184.0               | 97,893           | 2.7          |
| Region Istočno Sarajevo    | 184.0               | 30,077           | 0.8          |
| Canton 10/Livno            | 183.7               | 90,727           | 2.5          |
| Canton Herzegovina-Neretva | 182.8               | 236,278          | 6.5          |
| Canton Sarajevo            | 181.7               | 438,443          | 12.0         |
| Canton Central Bosnia      | 181.7               | 273,149          | 7.5          |
| Canton Zenica-Doboj        | 181.4               | 385,067          | 10.5         |
| Region Bijeljina-Zvornik   | 181.2               | 286,880          | 7.9          |
| Region Romanija-Foča       | 181.0               | 101,835          | 2.8          |
| Region Prijedor            | 180.9               | 160,453          | 4.4          |
| Canton Goražde             | 180.6               | 25,336           | 0.7          |
| Region Banja Luka          | 180.5               | 399,469          | 10.9         |
| Region Mrkonjić Grad       | 180.3               | 37,610           | 1.0          |
| Canton Una-Sana            | 180.0               | 299,343          | 8.2          |
| Canton Tuzla               | 180.0               | 477,278          | 13.1         |
| Region Doboj               | 179.7               | 237,898          | 6.5          |
| <b>BiH total</b>           | <b>181.7</b>        | <b>3,650,503</b> | <b>100.0</b> |
| Canton Posavina            | -                   | 48,089           | -            |
| Brčko district             | -                   | 93,028           | -            |

Note: The data for „Region Istočno Sarajevo“ were computed as an average of 4 municipalities (Istočna Ilidža, Istočni Stari Grad, Istočno Novo Sarajevo and Trnovo). Population size in each region was based on the preliminary results of the 2013 Census ([http://www.bhas.ba/obavjestenja/Saopcenje\\_Preliminarni\\_rezultati\\_Bos.pdf](http://www.bhas.ba/obavjestenja/Saopcenje_Preliminarni_rezultati_Bos.pdf)).

**Table S3b.** Averages of male height corrected for population size in 17 regions.

|                        | Average height (cm) | Population | % total | Average height corrected for population size |
|------------------------|---------------------|------------|---------|----------------------------------------------|
| Bosnia total           | 180.9               | 3,152,838  | 86.4    | 180.8                                        |
| Herzegovina total      | 183.6               | 497,665    | 13.6    | 183.4                                        |
| Federation total       | 181.9               | 2,323,514  | 63.6    | 181.4                                        |
| Republika Srpska total | 181.4               | 1,326,989  | 36.4    | 180.9                                        |
| BiH TOTAL              | 181.7               | 3,650,503  | 100.0   | 181.2                                        |

**Table S4.** Correlations between average male height and socioeconomic variables (for the year 2013) in 17 regions of BiH.

| Variable 1                | Variable 2                                | BiH<br>(17 regions)       | Bosnia<br>(13 regions)    | Herzegovina<br>(4 regions) |
|---------------------------|-------------------------------------------|---------------------------|---------------------------|----------------------------|
| Height                    | Net wage                                  | 0.43 (p=0.08)             | 0.34 (p=0.25)             | -0.58 (p=0.42)             |
| Height                    | Unemployment                              | 0.28 (p=0.28)             | 0.22 (p=0.46)             | 0.42 (p=0.58)              |
| Height                    | Agricultural activities (total)           | -0.24 (p=0.35)            | -0.48 (p=0.10)            | 0.94 (p=0.06)              |
| Height                    | Agricultural activities (market-oriented) | 0.11 (p=0.69)             | -0.36 (p=0.23)            | 0.61 (p=0.39)              |
| Net wage                  | Unemployment                              | 0.07 (p=0.80)             | -0.04 (p=0.91)            | 0.42 (p=0.58)              |
| Net wage                  | Agricultural activities (total)           | <b>-0.86 (p&lt;0.001)</b> | <b>-0.93 (p&lt;0.001)</b> | -0.68 (p=0.32)             |
| Net wage                  | Agricultural activities (market-oriented) | -0.24 (p=0.35)            | -0.49 (p=0.09)            | 0.30 (p=0.71)              |
| Unemployment              | Agricultural activities (total)           | 0.06 (p=0.83)             | 0.00 (p=0.99)             | 0.38 (p=0.62)              |
| Unemployment              | Agricultural activities (market-oriented) | 0.23 (p=0.37)             | -0.02 (p=0.94)            | 0.90 (p=0.10)              |
| Agric. activities (total) | Agricultural activities (market-oriented) | <b>0.58 (p=0.015)</b>     | <b>0.66 (p=0.014)</b>     | 0.43 (p=0.57)              |

Note: Significant correlations are in bold.

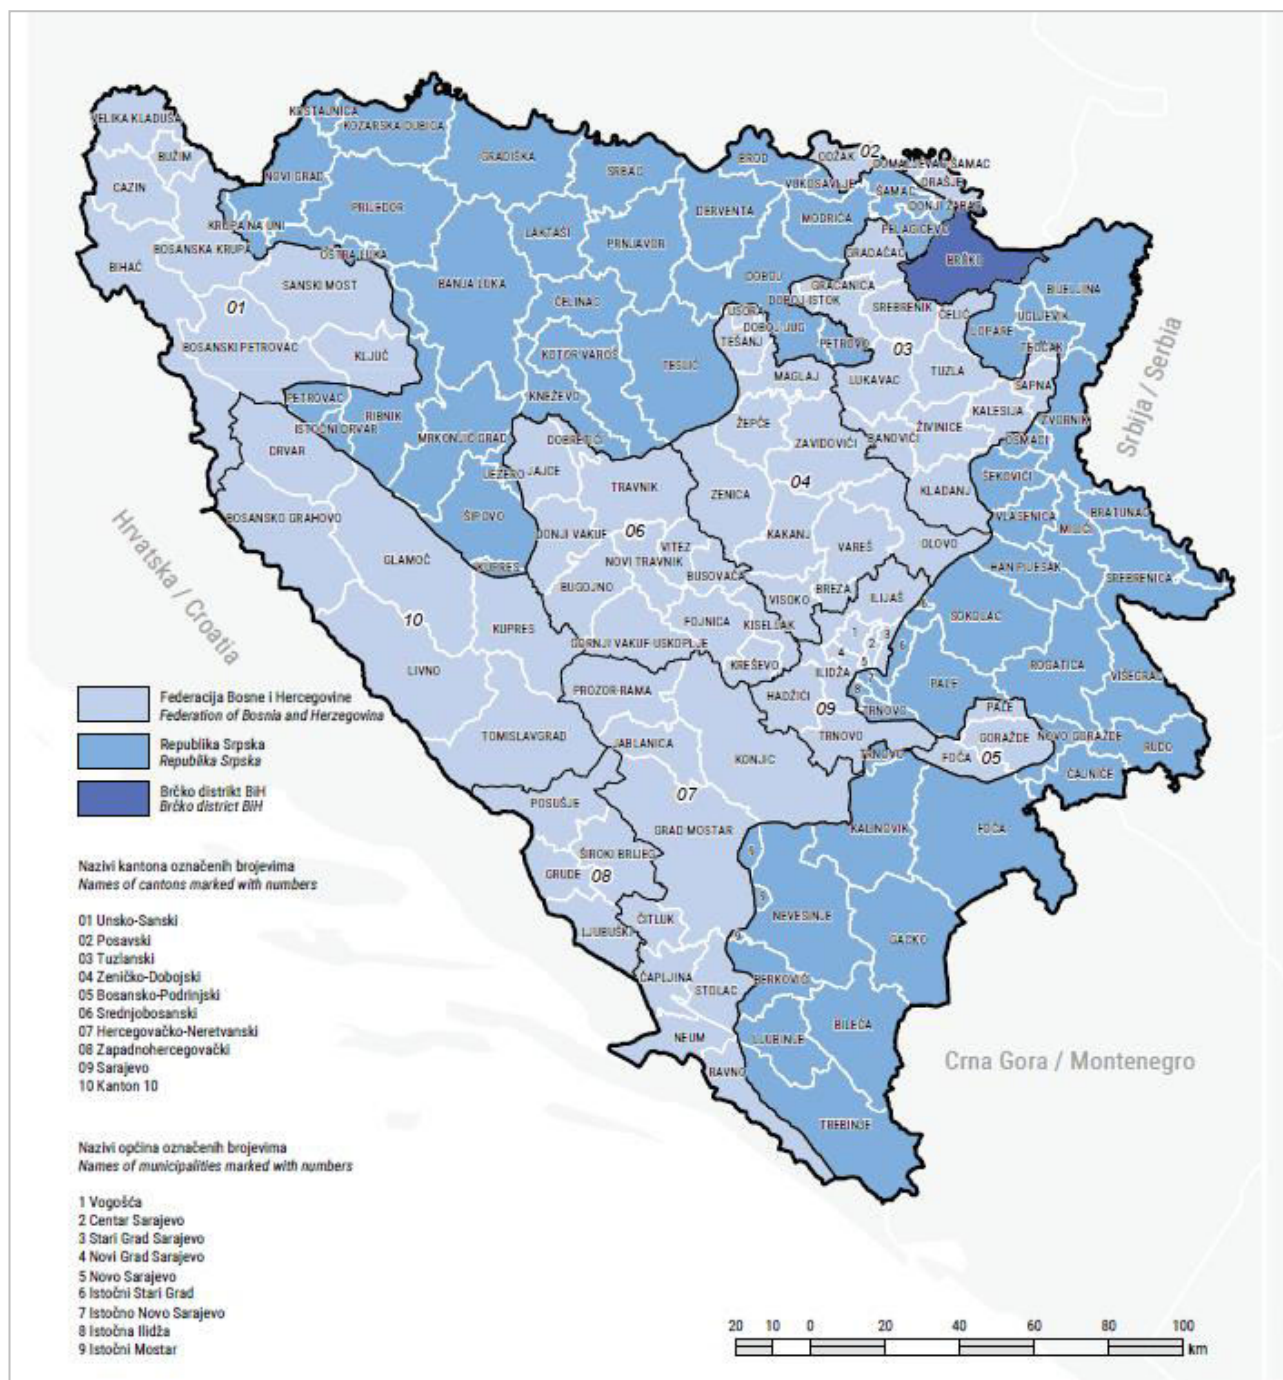

**Figure S1.** Administrative map of Bosnia and Herzegovina.

Source: Census of population, households and dwellings in Bosnia and Herzegovina, 2013. Final results.

<http://www.popis2013.ba/popis2013/doc/Popis2013prvovlzdanje.pdf>



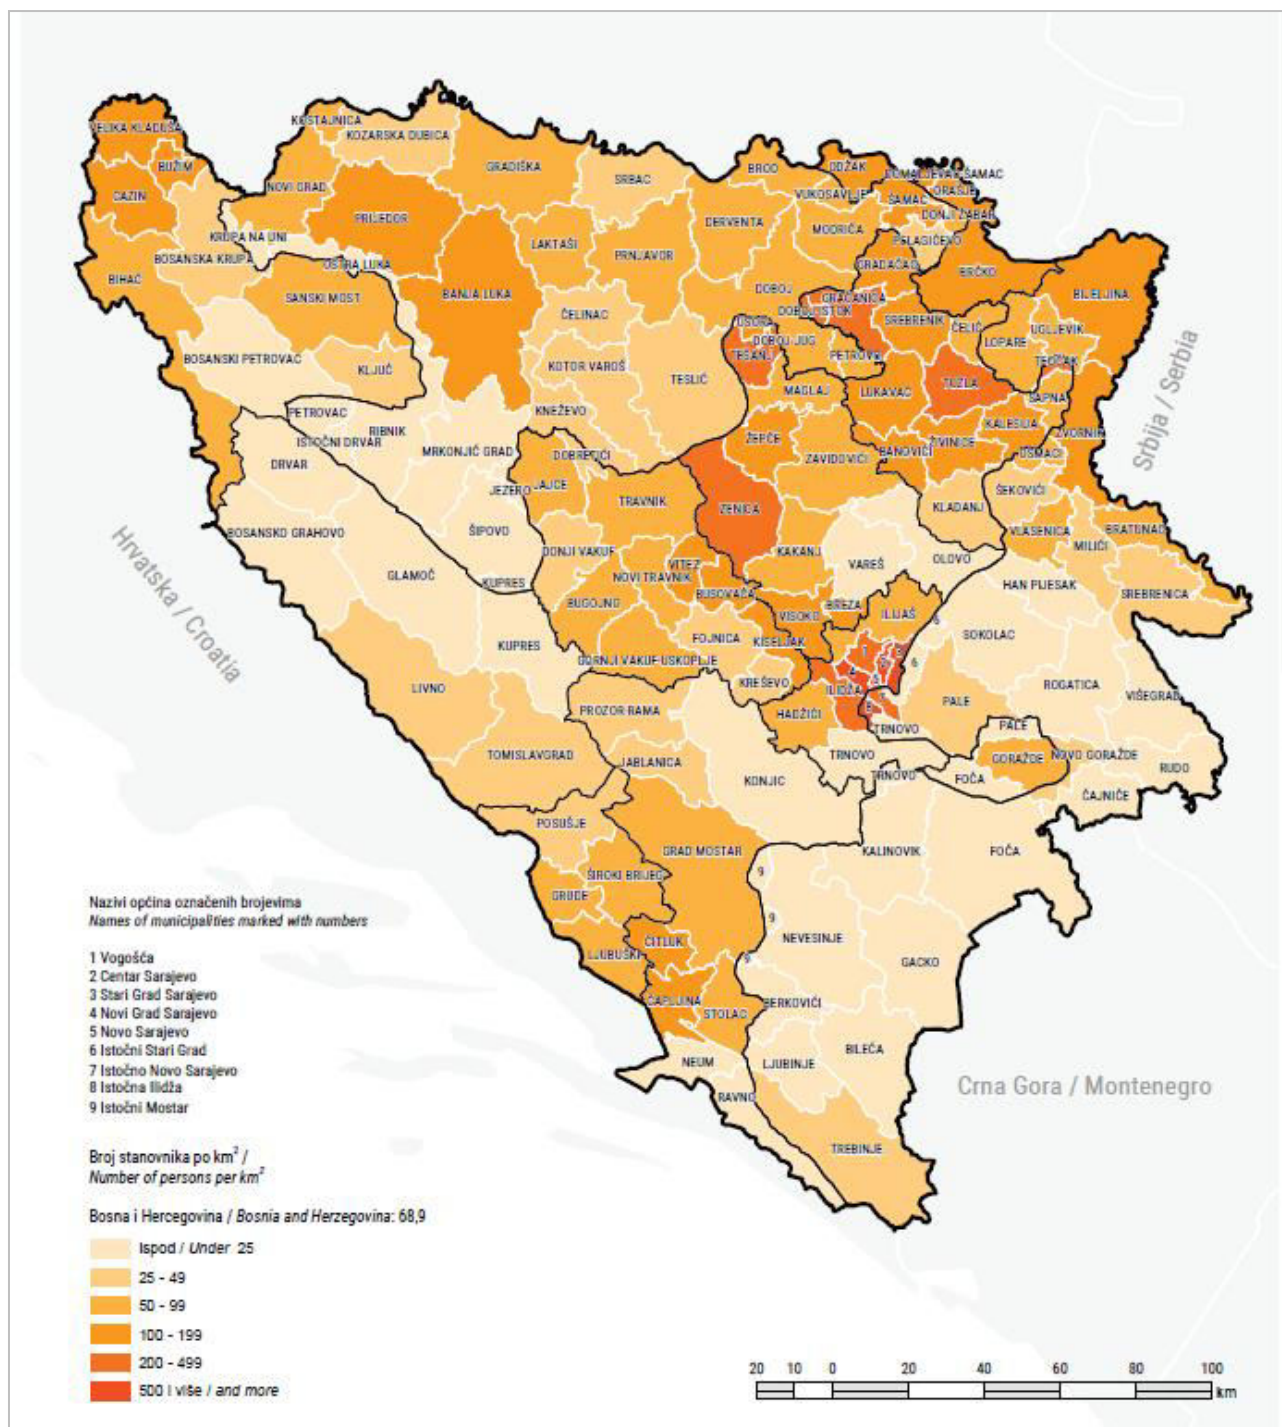

**Figure S2.** Population density in Bosnia and Herzegovina (people/km<sup>2</sup>).

Source: Census of population, households and dwellings in Bosnia and Herzegovina, 2013. Final results.  
<http://www.popis2013.ba/popis2013/doc/Popis2013prvovlzdanie.pdf>

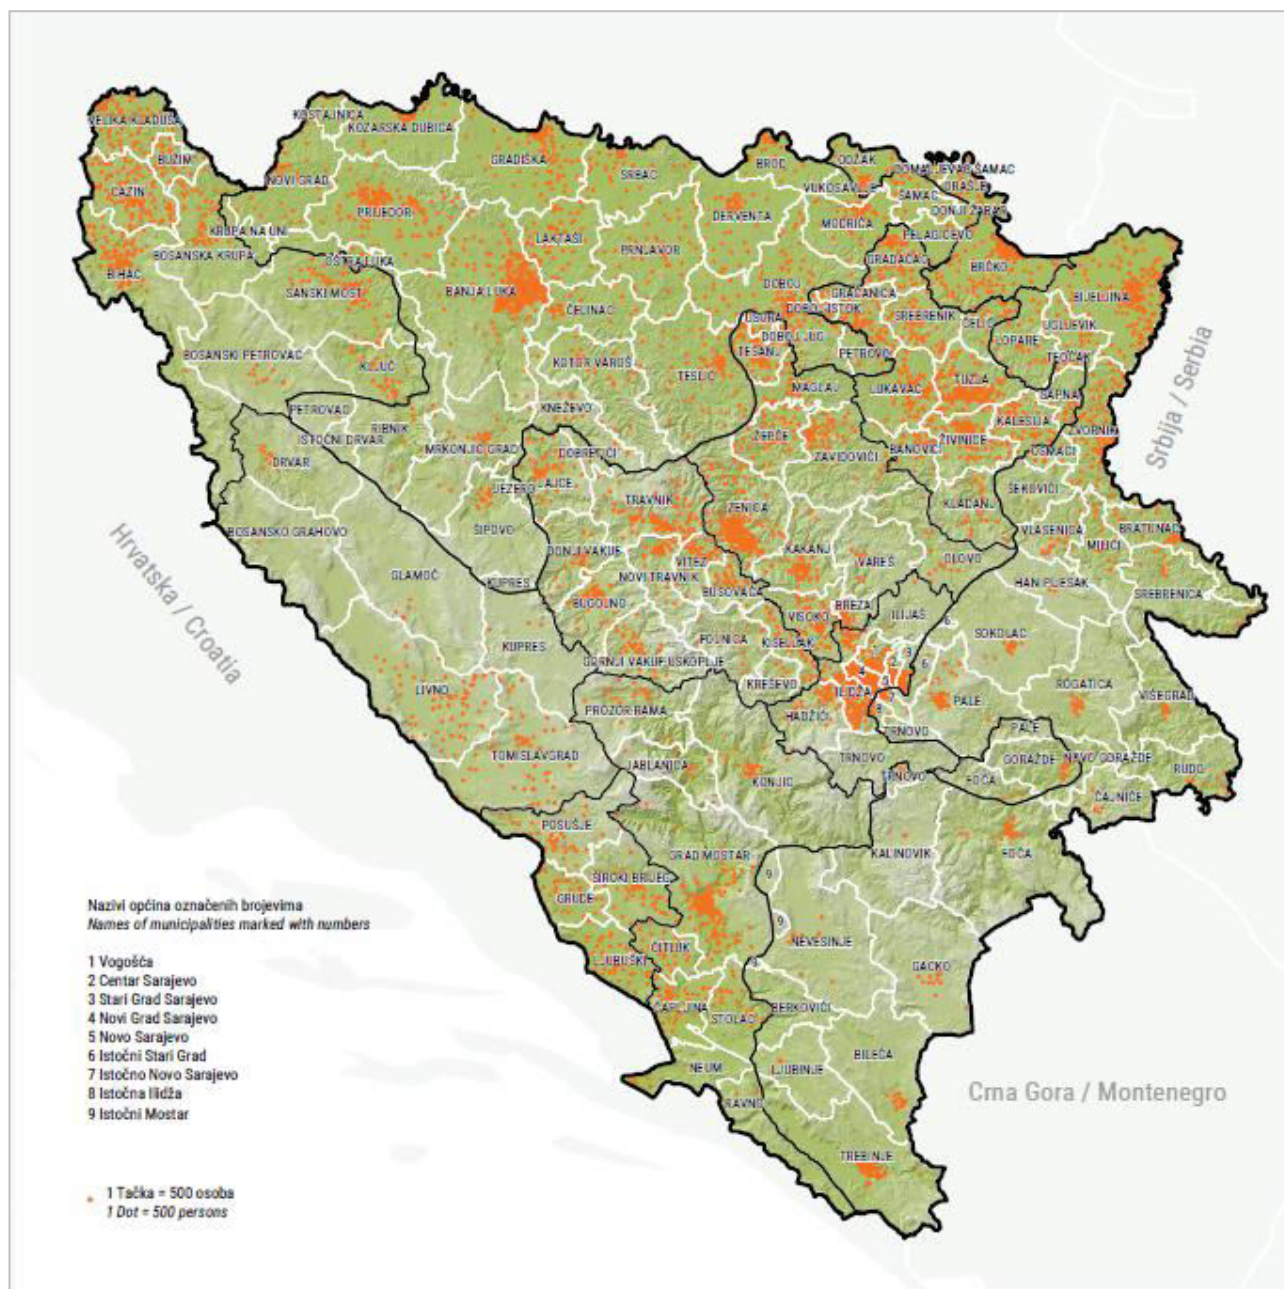

**Figure S3.** Density of settlements in Bosnia and Herzegovina.

Source: Census of population, households and dwellings in Bosnia and Herzegovina, 2013. Final results.

<http://www.popis2013.ba/popis2013/doc/Popis2013prvolzdanje.pdf>

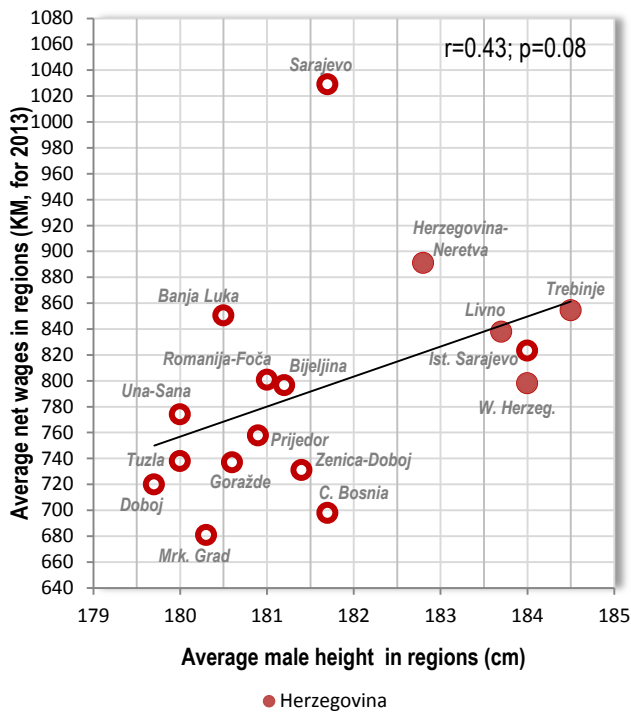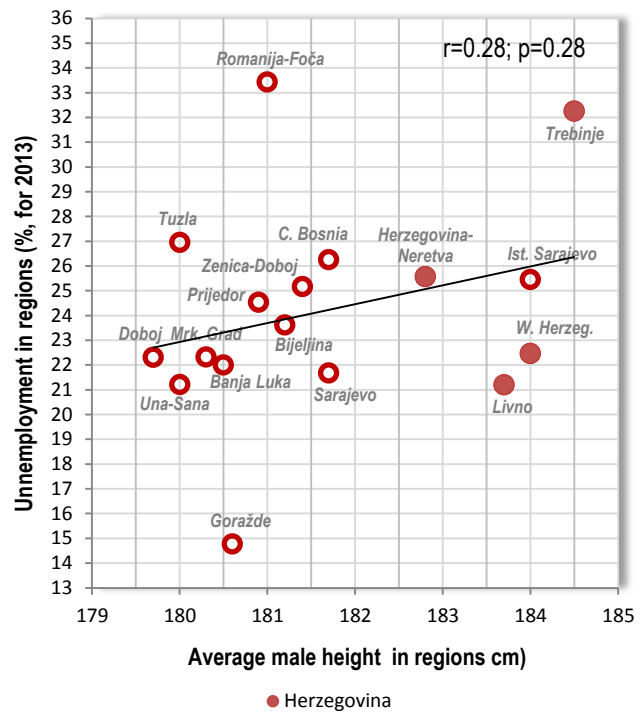

**Figure S4b.** Relationship between average male height and average net wages (for 2013, in KM/convertible marks) in 17 regions of BiH.

**Figure S4b.** Relationship between average male height and unemployment (for 2013) in 17 regions of BiH.

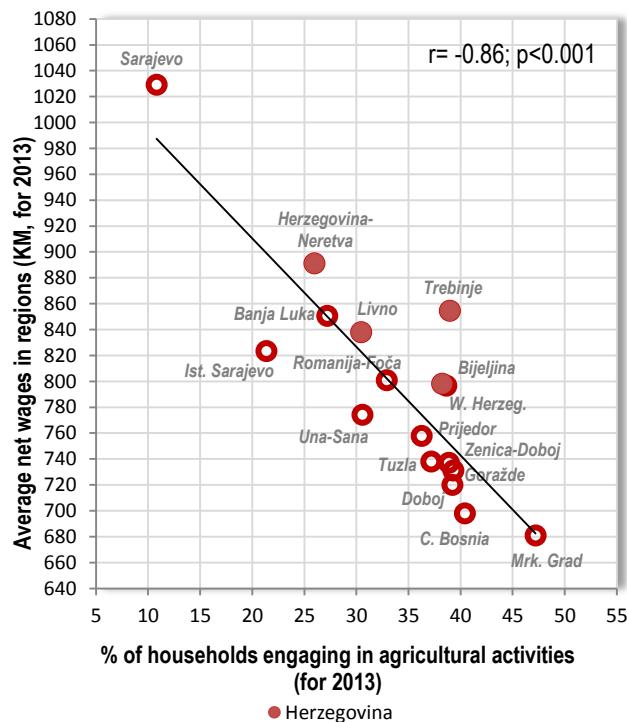

**Figure S4c.** Relationship between % of households engaging in agricultural activities (total) and average net wages (for 2013, in KM/convertible marks) in 17 regions of BiH.

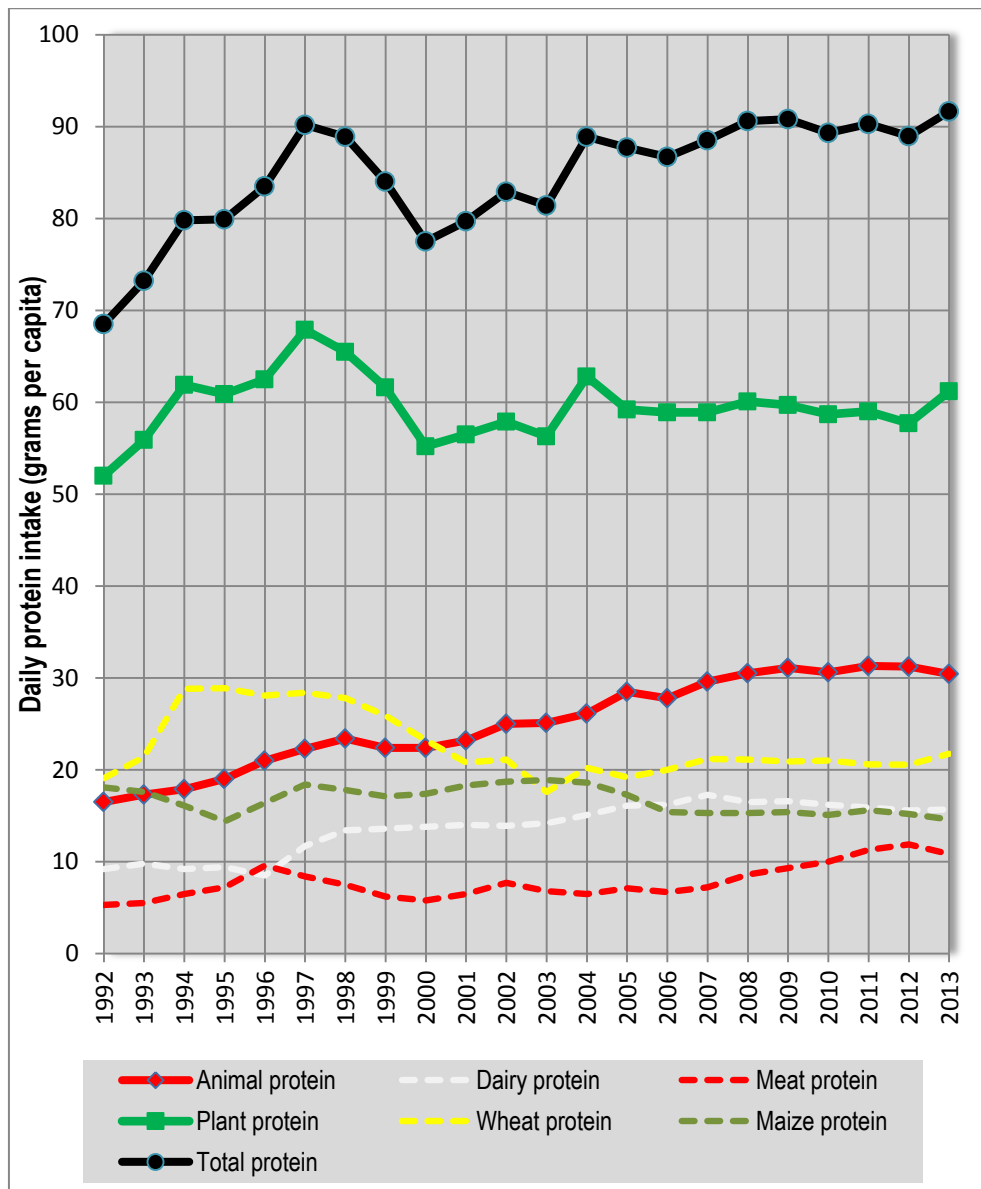

**Figure S5.** Average daily protein intake from major protein sources in BiH between 1992-2013.

Source: FAOSTAT, <http://faostat3.fao.org/download/FB/CC/E>.



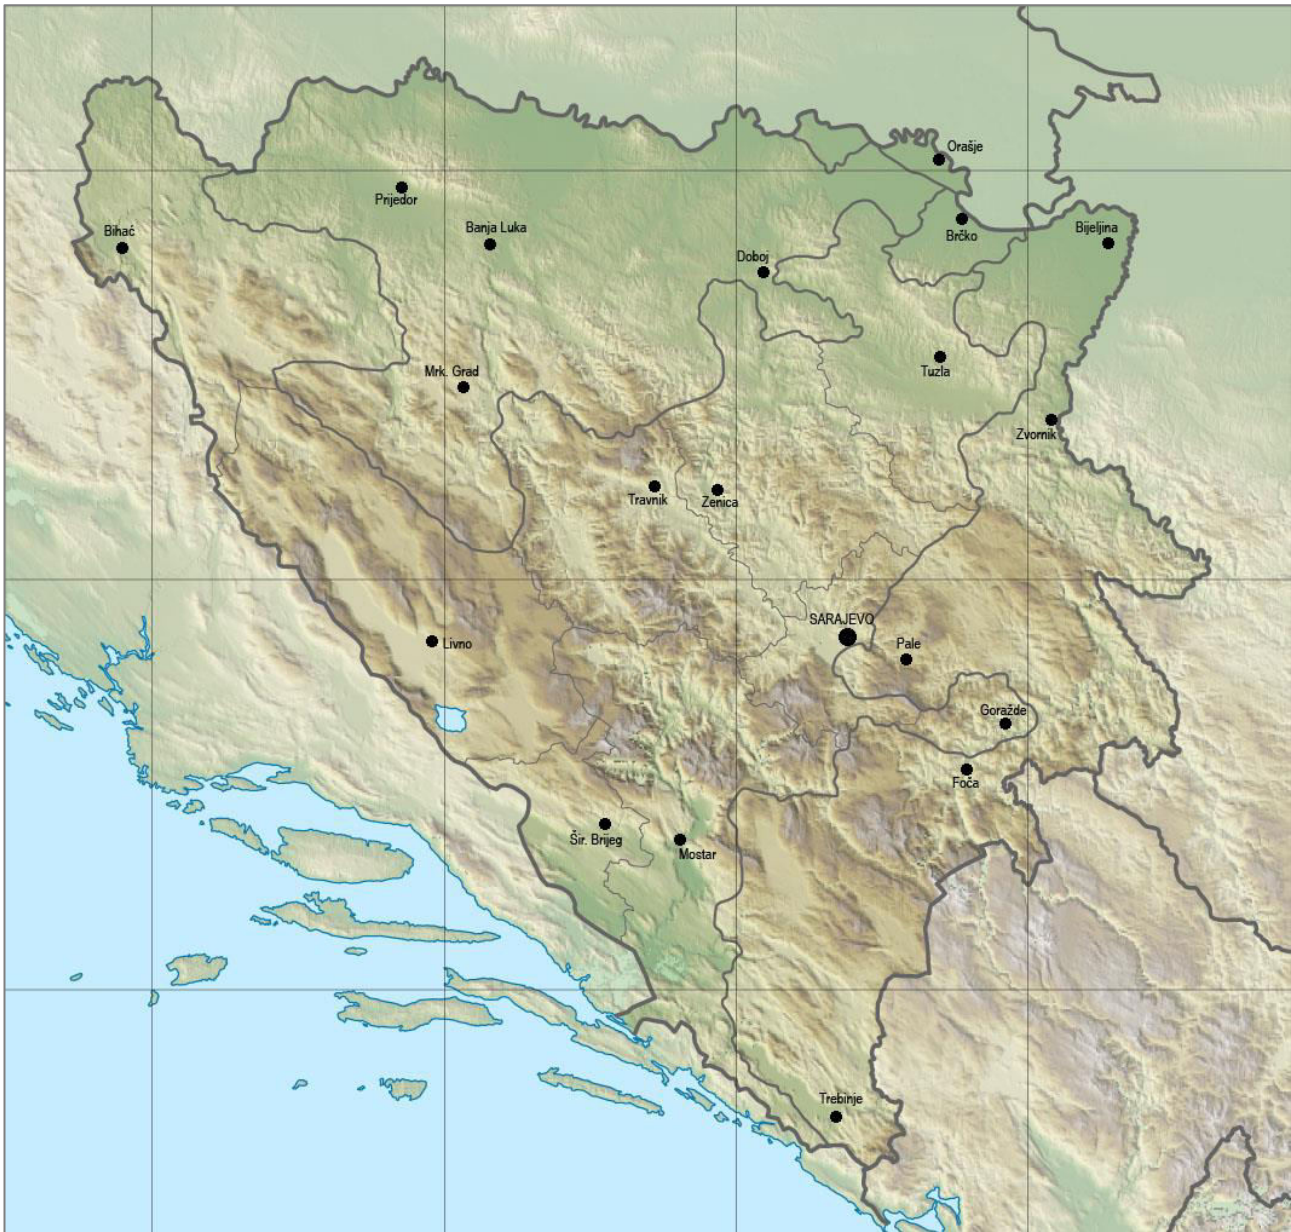

**Figure S6.** Relief map of Bosnia and Herzegovina.

Source: [https://commons.wikimedia.org/wiki/File:Bosnia\\_and\\_Herzegovina\\_relief\\_location\\_map.png](https://commons.wikimedia.org/wiki/File:Bosnia_and_Herzegovina_relief_location_map.png)
